# Supplementary material for: Regulating the coordination capacity of ATMP using melamine: facile synthesis of cobalt phosphides as bifunctional electrocatalysts for the ORR and HER
Source: Royal Society of Chemistry journal article supplement (doi:10.1039/d2nr04774h), 2022-01-01
Supplement: d2nr04774h1.pdf [file d2nr04774h1.pdf]

## Supplementary information

### Regulating coordination capacity of ATMP by melamine: Facile synthesis of cobalt phosphides as bifunctional electrocatalysts for ORR and HER

*Lian-Hua Xu<sup>a,b</sup>, Wen-Ju Wang<sup>c,\*\*</sup>, Xue-Ji Zhang<sup>a</sup>, Serge Cosnier<sup>d</sup>, Robert S. Marks<sup>e</sup>, Dan Shan<sup>a,\*</sup>*

*<sup>a</sup> MIIT Key Laboratory of Advanced Display Materials and Devices, School of Environmental and Biological Engineering, Nanjing University of Science and Technology, Nanjing 210094, China*

*<sup>b</sup> MOE Key Lab. of Environmental Remediation and Ecosystem Health, Institute of Environmental Health, College of Environmental and Resource Sciences, Zhejiang University, Hangzhou 310058, China*

*<sup>c</sup> School of Energy and Power Engineering, Nanjing University of Science and Technology, Nanjing 210094, China*

*<sup>d</sup> University of Grenoble Alpes-CNRS, DCM UMR 5250, F-38000 Grenoble, France*

*<sup>e</sup> Department of Biotechnology Engineering, Ben-Gurion University of the Negev, Beer-Sheva, Israel.*

\*Corresponding author:

Email: [danshan@njust.edu.cn](mailto:danshan@njust.edu.cn) (D. Shan)

[wangwenju1982@gmail.com](mailto:wangwenju1982@gmail.com) (W.J. Wang)

Fax: 0086-25-84303107

## Contents

**Table S1** BET results of NCP, HNCP and N-CoP/NC.

**Table S2** Quantitative XPS analysis for N-CoP/NC, HNCP and NCP.

**Table S3** Comparison of ORR performance of some recently reported TMPs and doped CoP electrocatalysts in 0.1 M KOH.

**Table S4** Comparison of HER performance of some other TMPs and doped CoP electrocatalysts in 0.5 M H<sub>2</sub>SO<sub>4</sub>.

**Figure S1** Picture of L1 and Co<sup>2+</sup> after 6 mins reaction in 15 mL DI water at 80 °C.

**Figure S2** High resolution XPS spectra of O 1s of NCP, HNCP and N-CoP/NC.

**Figure S3** CVs of (A) NCP, (B) HNCP and (C) 20% commercial Pt/C in N<sub>2</sub>-saturated (black line) versus O<sub>2</sub>-saturated (red line) in 0.1 M KOH electrolyte.

**Figure S4** LSV curves and Koutecky-Levich plots ( $j^{-1}$  versus  $\omega^{-1/2}$ ) for (A, B) NCP, (C, D) HNCP, (E, F) N-CoP/NC and (G, H) 20% commercial Pt/C in O<sub>2</sub>-saturated 0.1 M KOH solution at a scan rate of 10 mV s<sup>-1</sup> at a series of rotation rates from 400 to 2025 rpm.

**Figure S5** (A) The ring current and disk current on N-CoP/NC electrode at rotation speed of 1600 rpm at a scan rate of 10 mV s<sup>-1</sup> in O<sub>2</sub>-saturated 0.1 M KOH aqueous solution, (B) The electron transfer number and H<sub>2</sub>O<sub>2</sub> production yields of ORR on N-CoP/NC.

**Figure S6** The CV plots of (A) NCP, (B) HNCP and (C) N-CoP/NC with different scan rates in 0.1 M KOH electrolyte.

**Figure S7**  $C_{dl}$  stands for ECSA of the three electrocatalysts for ORR.

**Figure S8** The CV plots of (A) NCP, (B) HNCP and (C) N-CoP/NC with different scan rates in 0.5 M H<sub>2</sub>SO<sub>4</sub> electrolyte.

**Figure S9** EISs of NCP, HNCP and N-CoP/NC tested at 0.16 V vs. RHE.

**Figure S10** (A) XRD and (B) HRTEM patterns of N-CoP/NC after ORR.

**Figure S11** (A) XRD and (B) HRTEM patterns of N-CoP/NC after HER.

## **Materials characterization**

The ultraviolet absorption spectrum of the specimens were measured by a liquid ultraviolet-visible spectrophotometer (UV-3600, Shimadzu Corporation). Their infrared spectrum was measured by TENSOR Model 27 Fourier Transform Infrared Spectrometer (FT-IR), while the Raman spectrum test was carried out with a Raman microscope (Raman, iHR550, HORIBA Scientific Instruments Division), using a 532 nm solid-state laser as the laser source, and the test range at 200-2000  $\text{cm}^{-1}$ . The thermogravimetric-differential scanning calorimetry analysis of the sample was carried out on a synchronous thermal analyzer (TG-DSC, STA 449 F1 Jupiter, manufactured by Netzsch Instruments, Germany), the temperature range was taken from room temperature to 900 °C, the heating rate at 10 °C/min; The crystal phase of the samples was characterized by X-ray diffraction (XRD, Bruker D8, Bruker Technology Co., Ltd.) with a power of 40 kV/40 mA. The scanning range was set at 10-60°; The BET results were recorded on Quantachrome Autosorb-iQ-C. The morphology and size of the synthesize was visualized using a transmission electron microscope (TEM, FEI Tecnai 20, FEI company in the United States) and a high resolution transmission electron microscope (HRTEM, Jeol jem2100f, Japan Electronics (JEOL) company). The crystal structure and element morphology of the specimens were characterized by X-ray photoelectron spectroscopy (XPS, ESCALAB 250XI, Thermo Fisher Scientific, Germany). All spectra used the binding energy of C 1s peak at 284.6 eV Calibration.

## Electrochemical measurements

A three-electrode cell was operated for electrochemical analysis for all the aforementioned catalysts. A graphite rod was used as a counter electrode, Hg/HgO and Hg/Hg<sub>2</sub>SO<sub>4</sub> electrode were used as reference electrodes for ORR and HER test respectively. To prepare the catalyst ink, 10.0 mg of catalyst was dispersed into 0.25 mL of ethanol and 0.75 mL of DI water, and then sonicated for 30 mins to obtain a homogeneous slurry. To prepare a working electrode, 10 μL of the slurry was dropped on a rotating disk electrode (diameter 5 mm, RDE, Metrohm) for ORR or a polished glass carbon (GC) electrode for OER and both, dried slowly under ambient conditions. A commercial Pt/C electrode (20 wt%) was also prepared for the comparison tests. All catalyst loading was controlled at 0.51 mg cm<sup>-2</sup>. For ORR, the performance was first recorded by cyclic voltammetry (CV) in O<sub>2</sub>-saturated 0.1 mol L<sup>-1</sup> KOH with a scan rate of 10 mV s<sup>-1</sup> at room temperature. Linear scanning voltammetry (LSV) was performed in a potential range from 0.2 to -0.8 V with different rotation rates (400, 625, 900, 1225, 1600 and 2025 rpm) at a scan rate of 10 mV s<sup>-1</sup>. During testing, a constant injection of O<sub>2</sub> or N<sub>2</sub> was maintained in the electrolyte. All the potentials were converted to a reversible hydrogen electrode (RHE),  $E(\text{RHE}) = E(\text{Hg}/\text{Hg}_2\text{Cl}_2) + 1.008 \text{ V}$ . The HER performance was collected in an N<sub>2</sub> saturated 0.5 M H<sub>2</sub>SO<sub>4</sub> solution.  $E(\text{RHE}) = E(\text{Hg}/\text{Hg}_2\text{Cl}_2) + 0.240 \text{ V}$ .

## Calculation methods

All DFT calculations were recorded as implemented in the Vienna *Ab Initio* Simulation Package (VASP),<sup>[1,2]</sup> so as to describe the interaction between the electrons with frozen-core approximation and ions. Furthermore, the projector augmented wave (PAW) method with the Perdew-Burke-Ernzerhof (PBE) was performed.<sup>[3]</sup> Until the forces acting on each ion reached a smaller value than 0.05 eV/Å, the stationary points were identified by the conjugate gradient method. The k-points meshes of  $1 \times 1 \times 1$  were collected for the Brillouin zone integration. The convergence tolerance of the energy was set to be  $10^{-4}$  eV.

The two opposite reaction pathways of ORR (1-4) can be expressed as the following steps<sup>[4]</sup>:

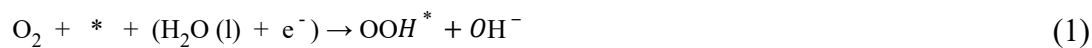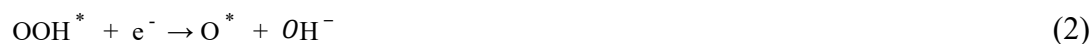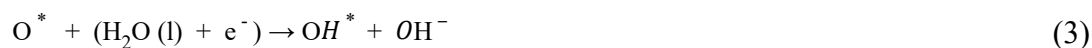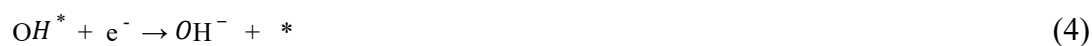

Here \* represents an active site on the catalysts surface, whereas, OH\*, O\*, OOH\* represent catalytic intermediates. The free energies were collected using Eq. (9).<sup>[5]</sup> In the following,  $T$  (298.15 K) represents temperature,  $\Delta\text{ZPE}$  the change of zero-point energy, and  $\Delta S$  the difference in entropy.  $\Delta G_U = -neU$ , where  $U$  is the potential of the electrode and  $n$  is the number of electrons transferred.  $\Delta G_{\text{pH}} = K_{\text{B}}T \times \ln 10 \times \text{pH}$ , where

$K_B$  is the Boltzmann constant, the pH value for ORR was defined to be 14, for OER was 14, for HER was 0.

$$\Delta G = \Delta E + \Delta ZPE - T\Delta S + \Delta G_U + \Delta G_{pH} \quad (5)$$

For HER, the Gibbs free energy of H adsorption was obtained by Eq. (10)

$$\Delta G_H = \Delta E_H + \Delta E_{ZPE} - T\Delta S_H \quad (6)$$

Where  $\Delta E_{ZPE}$  is the zero-point energy and  $\Delta S_H$  is the entropy.  $\Delta E_{ZPE} - T\Delta S_H$  is 0.28 eV in standard condition at  $T = 300$  K.

Therefore, the  $\Delta G_H$  was calculated by Eq. (11)

$$\Delta G_H = \Delta E_H + 0.28 \text{ eV} \quad (7)$$

**Table S1** BET results of NCP, HNCP and N-CoP/NC.

| Catalysts | specific surface area             | pore volume                        |
|-----------|-----------------------------------|------------------------------------|
|           | (m <sup>2</sup> g <sup>-1</sup> ) | (cm <sup>3</sup> g <sup>-1</sup> ) |
| NCP       | 159                               | 0.252                              |
| HNCP      | 271                               | 0.532                              |
| N-CoP/NC  | 427                               | 0.627                              |



**Table S2** Quantitative XPS analysis for N-CoP/NC, HNCP and NCP.

| Element | Peak                      | N-CoP/NC         |                | HNCP             |                 | NCP              |                 |
|---------|---------------------------|------------------|----------------|------------------|-----------------|------------------|-----------------|
|         |                           | Position<br>(eV) | Content<br>(%) | Position<br>(eV) | Content<br>(eV) | Position<br>(eV) | Content<br>(eV) |
| Co 2p   | <b>Co<sub>total</sub></b> | -                | 2.07           | -                | -               | -                | -               |
|         | Co-P                      | 779.53           | 17.31          | -                | -               | -                | -               |
|         | Co-PO <sub>x</sub>        | 781.78           | 49.64          | -                | -               | -                | -               |
|         | Sat.                      | 786.18           | 33.05          | -                | -               | -                | -               |
| N 1s    | <b>N<sub>total</sub></b>  | -                | 4.71           | -                | 5.93            | -                | 4.72            |
|         | Pyridinic N               | 398.42           | 12.25          | 398.73           | 13.09           | 398.62           | 13.04           |
|         | Pyrrolic N                | -                | -              | 399.40           | 23.03           | 400.22           | 24.65           |
|         | Co-N                      | 399.59           | 24.91          | -                | -               | -                | -               |
|         | Graphitic N               | 401.17           | 61.69          | 401.23           | 61.65           | 401.53           | 35.84           |
|         | Oxidated N                | 403.70           | 1.15           | 404.04           | 2.23            | 402.86           | 26.46           |
| P 2p    | <b>P<sub>total</sub></b>  | -                | 7.75           | -                | 6.87            | -                | 8.82            |
|         | 2P <sub>3/2</sub>         | 129.83           | 10.21          | -                | -               | -                | -               |
|         | 2P <sub>1/2</sub>         | 130.56           | 5.25           | -                | -               | -                | -               |
|         | PO <sub>x</sub>           | 133.6            | 84.54          | 133.45           | 100.00          | 134.35           | 100.00          |
| O 1s    | <b>O<sub>total</sub></b>  | -                | 12.16          | -                | 19.28           | -                | 36.37           |
|         | -O-                       | 530.56           | 27.53          | 530.55           | 32.67           | 530.66           | 20.85           |
|         | -OH/O <sub>2</sub>        | 531.54           | 21.09          | 531.52           | 34.67           | 531.81           | 43.16           |
|         | H <sub>2</sub> O          | 532.74           | 51.38          | 532.58           | 32.66           | 533.00           | 35.98           |

Figure S1

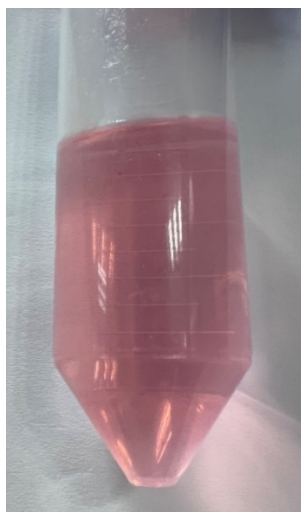

Figure S2

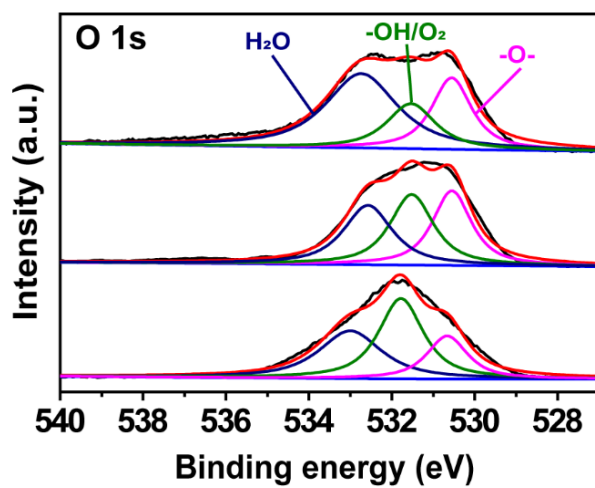

Figure S3

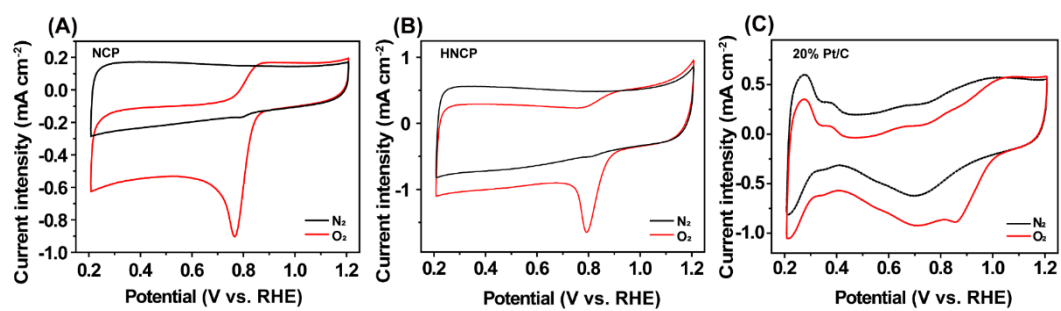

Figure S4

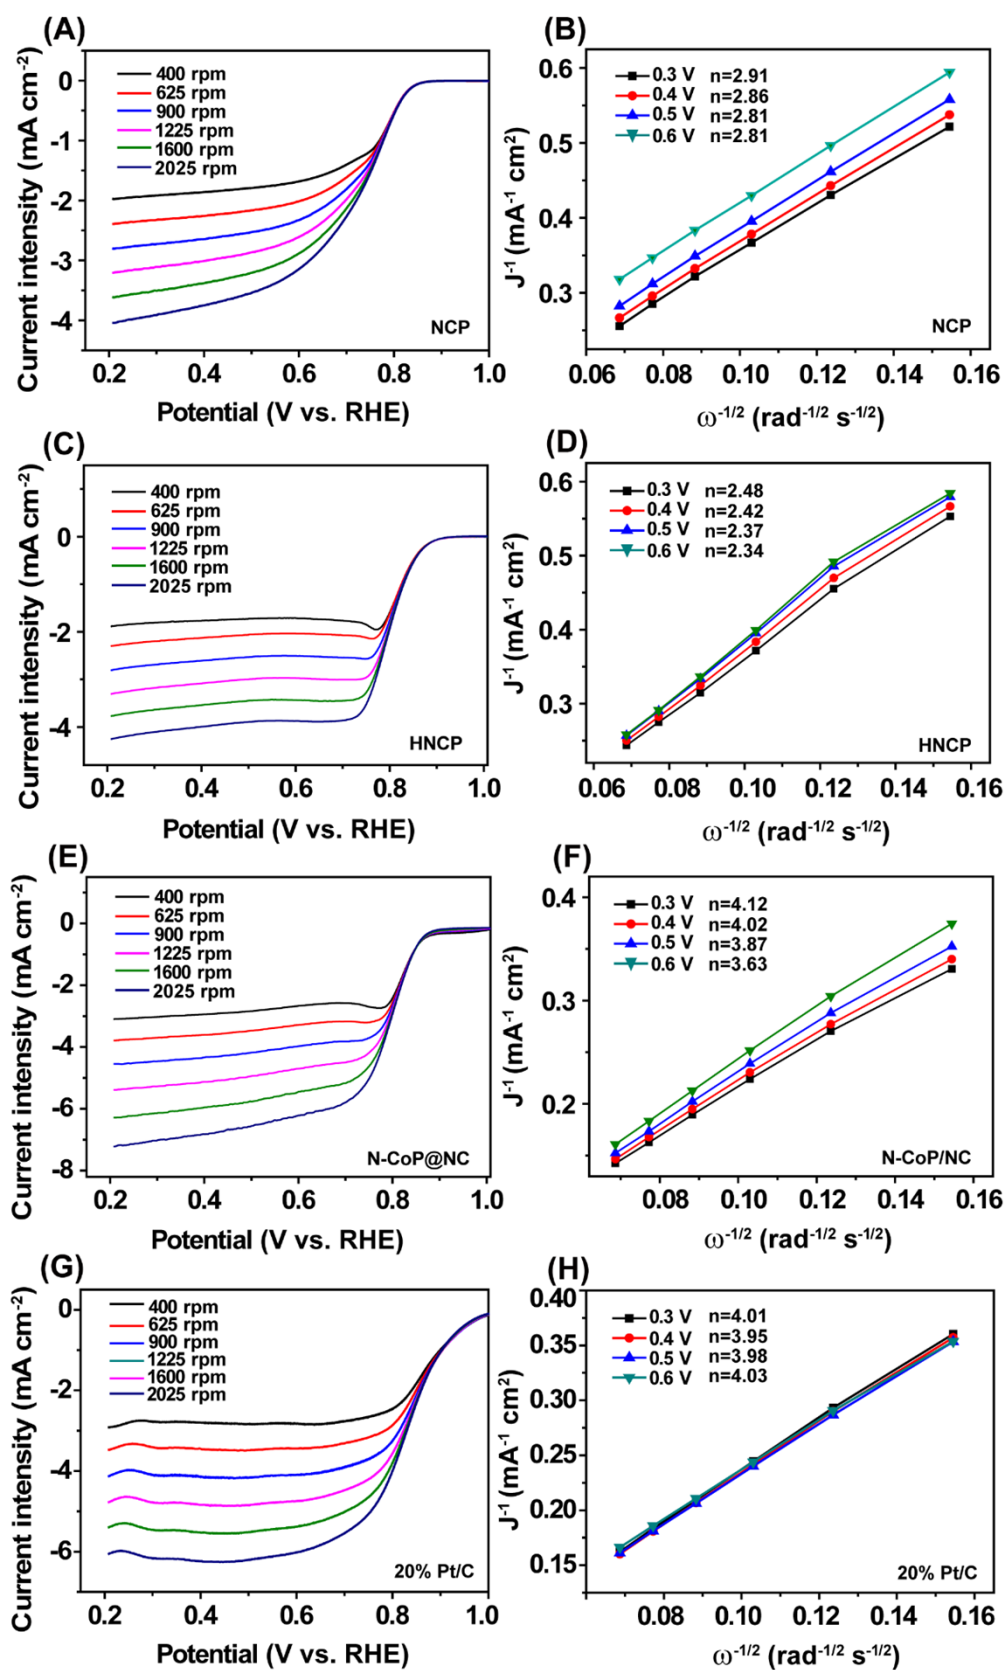

Figure S5

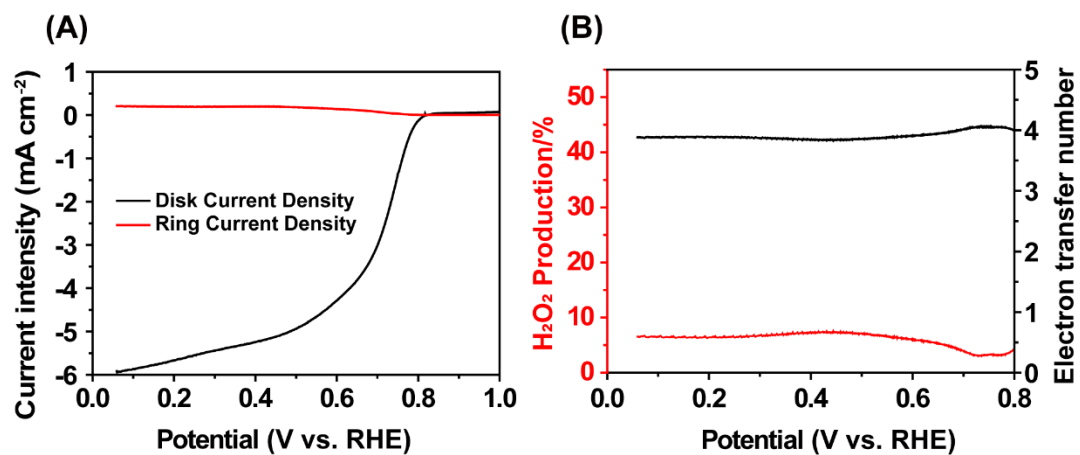

Figure S6

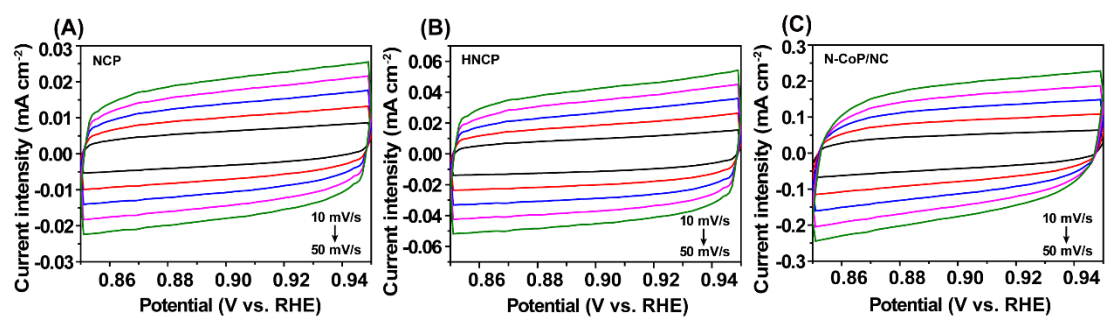

Figure S7

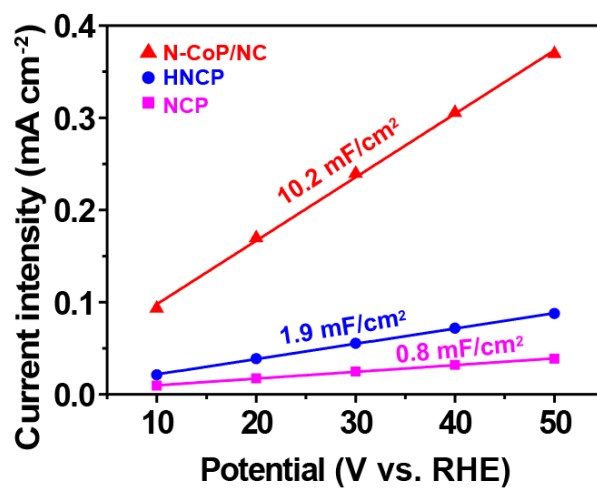

Figure S8

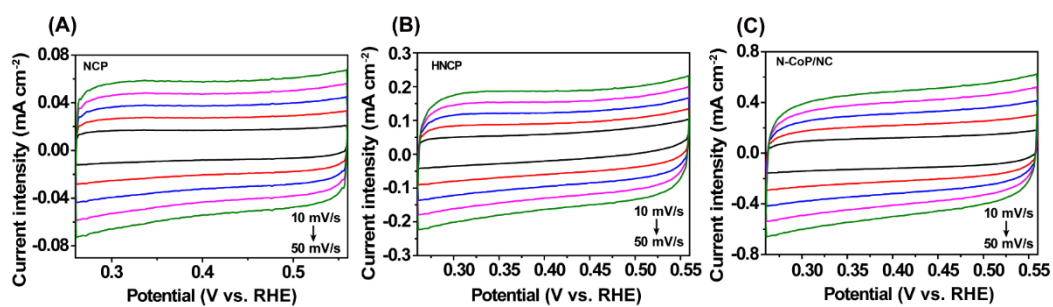

Figure S9

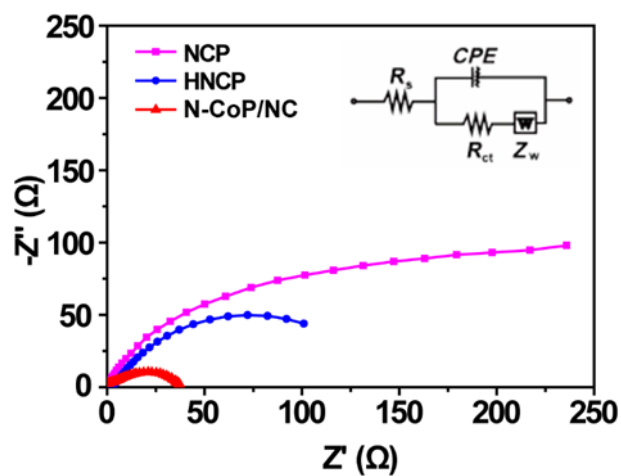

Figure S10

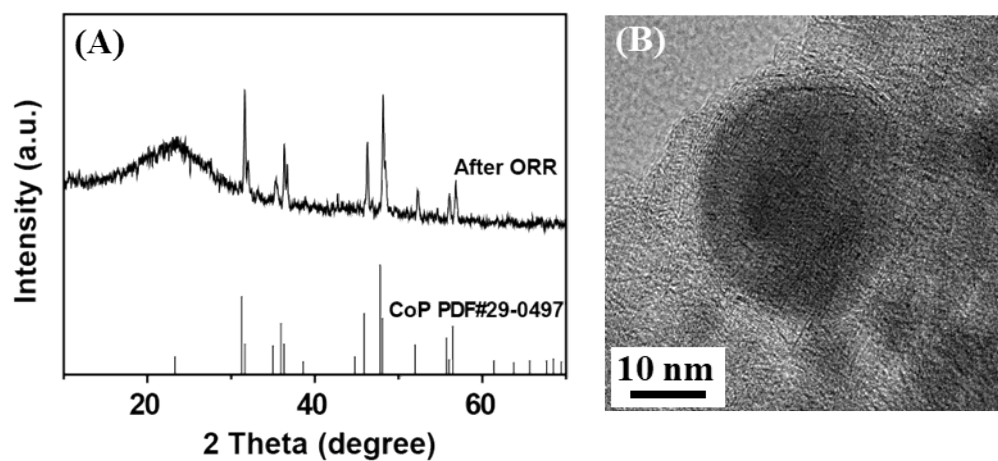

Figure S11

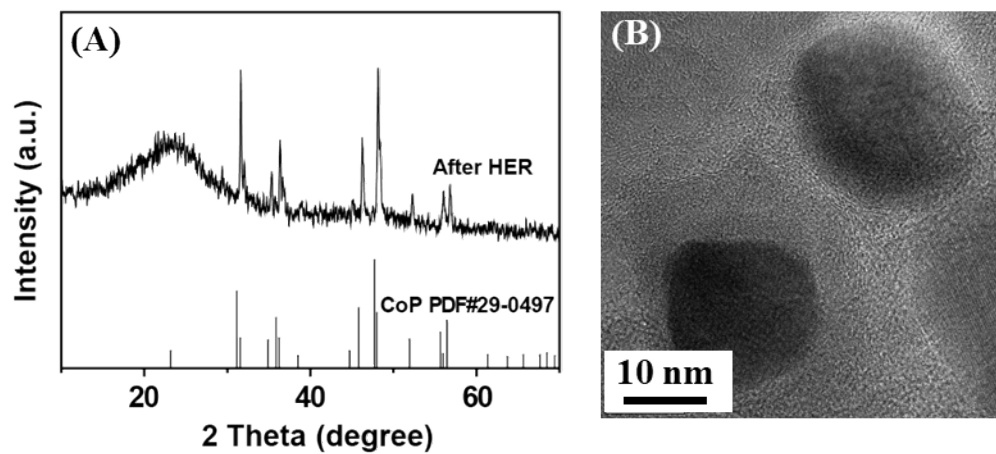

**Table S3** Comparison of ORR performance of some recently reported TMPs and doped

CoP electrocatalysts in 0.1 M KOH.

| Catalyst                       | $E_{\text{onset}}$<br>(V vs. RHE) | $E_{1/2}$<br>(V vs. RHE) | $j_{\text{limit}}$<br>(mA/cm <sup>2</sup> ) | Ref.             |
|--------------------------------|-----------------------------------|--------------------------|---------------------------------------------|------------------|
| <b>Our work</b>                | <b>0.908</b>                      | <b>0.824</b>             | <b>6.280</b>                                | <b>This work</b> |
| CoP/NC-800                     | 0.90                              | 0.78                     | 4.60                                        | [6]              |
| Co <sub>2</sub> P/CoN-in-NCNTs | 0.96                              | 0.85                     | 5.01                                        | [7]              |
| Co <sub>2</sub> P@NPC-1        | -                                 | 0.83                     | 5.12                                        | [8]              |
| CoP-PBSCF                      | -                                 | 0.75                     | ~4.60                                       | [9]              |
| CoP                            | -                                 | 0.62                     | -                                           | [9]              |
| Bi-CoP/NP-DG                   | -                                 | 0.81                     | -                                           | [10]             |
| CoNP@NC/NG                     | 0.90                              | 0.83                     | 4.55                                        | [11]             |
| CoP@SNC                        | 0.87                              | 0.79                     | ~4.85                                       | [12]             |
| Co <sub>2</sub> P@CoNPG-800    | 0.90                              | 0.81                     | -                                           | [13]             |
| Fe/Co-NpGr                     | 0.93                              | N.A.                     | ~4.25                                       | [14]             |
| Co/CoP-HNC                     | -                                 | 0.83                     | ~4.95                                       | [15]             |
| CoP/Ni <sub>2</sub> P@NC/NF    | -                                 | 0.79                     | 4.95                                        | [16]             |
| CoP/CN/Ni                      | -                                 | 0.80                     |                                             | [17]             |
| FeCo/Co <sub>2</sub> P@NPCF    | 0.825                             | 0.78                     |                                             | [18]             |

**Table S4** Comparison of HER performance of some other TMPs and doped CoP electrocatalysts in 0.5 M H<sub>2</sub>SO<sub>4</sub>.

| Catalyst                                   | $\eta_{10}$<br>(mV) | Tafel slope<br>(mV dec <sup>-1</sup> ) | Ref.      |
|--------------------------------------------|---------------------|----------------------------------------|-----------|
| Our work                                   | 150                 | 77                                     | This work |
| CoP/HNCNP@2DCoP                            | 173                 | 108.7                                  | [19]      |
| CoP/HNCNP                                  | 189.5               | 168.5                                  | [19]      |
| amorphous CoP/NF                           | 143                 | -                                      | [20]      |
| HNDCM-Co/CoP                               | 216                 | -                                      | [21]      |
| Co <sub>2</sub> P NR/Ti                    | 134                 | -                                      | [22]      |
| CoP NBA/Ti                                 | 203                 |                                        | [23]      |
| Ni <sub>0.62</sub> Co <sub>0.38</sub> P    | 166                 | 72                                     | [24]      |
| CoP@NC                                     | 170                 | 62                                     | [25]      |
| Co <sub>5</sub> Mo <sub>1.0</sub> P NSs@NF | 174                 | 190                                    | [26]      |
| CoP/RGO                                    | 157                 | 70.2                                   | [27]      |
| CoP/Co <sub>2</sub> P/Co                   | 169                 | 65                                     | [28]      |
| CoP microspheres                           | 226                 | 76                                     | [29]      |
| CoP/CNTs                                   | 198                 | 68                                     | [30]      |



## References:

1. G. Kresse and J. Hafner, *Phys. Rev. B*, 47 1993, 47, 558.
2. G. Kresse and J. Hafner, *Phys. Rev. B*, 1994, 49, 14251.
3. P.E. Blöchl, *Phys. Rev. B*, 1994, 50, 17953.
4. Z. Zhao and Z. Xia, *ACS Catal.* 2016, 6, 1553-1558.
5. M. Ma, A. Kumar, D. Wang, Y. Wang, Y. Jia, Y. Zhang, G. Zhang, Z. Yan and X. Sun, *Appl. Catal., B*, 2020, 274, 119091.
6. L. Feng, R. Ding, Y. Chen, J. Wang and L. Xu, *J. Power Sources*, 2020, 452, 227837.
7. Y. Guo, P. Yuan, J. Zhang, H. Xia, F. Cheng, M. Zhou, J. Li, Y. Qiao, S. Mu and Q. Xu, *Adv. Funct. Mater.*, 2018, 28, 1805641.
8. J. Li, G. Liu, B. Liu, Z. Min, D. Qian, J. Jiang and J. Li, *Int. J. Hydrogen Energy*, 2018, 43, 1365-1374.
9. Y. Q. Zhang, H. B. Tao, Z. Chen, M. Li, Y. F. Sun, B. Hua and J. L. Luo, *J. Mater. Chem. A*, 2019, 7, 26607-266017.
10. Z. Chen, H. Wu, W. Guo, C. Cao and Z. Chen, *Appl. Catal., B*, 2019, 265, 118576.
11. X. Zhong, Y. Jiang, X. Chen, L. Wang, G. Zhuang, X. Li and J. G. Wang, *J. Mater. Chem. A*, 2016, 4, 10575-10584.
12. T. Meng, Y. N. Hao, L. Zheng and M. Cao, *Nanoscale* 2018, 10, 14613-14626.
13. H. Jiang, C. Li, H. Shen, Y. Liu, W. Li and J. Li, *Electrochim. Acta*, 2017, 231, 344-353.

14. T. Palaniselvam, V. Kashyap, S. N. Bhange, J. B. Baek and S. Kurungot, *Adv. Funct. Mater.*, 2016, 26, 2150-2162.
15. Y. Hao, Y. Xu, W. Liu and X. Sun, *Mater. Horiz.*, 2018, 5, 108-115.
16. X. Lv, W. Tian, Y. Liu and Z. Y. Yuan, *Mater. Chem. Front.*, 2019, 3, 2428-2436.
17. T. Chen, J. Ma, S. Chen, Y. Wei, C. Deng, J. Chen, J. Hu and W. Ding, *Chem. Eng. J.*, 2021, **415**, 129031.
18. Q. Shi, Q. Liu, Y. Ma, Z. Fang, Z. Liang, G. Shao, B. Tang, W. Yang, L. Qin and X. Fang, *Adv. Energy Mater.* 2020, **10**, 1903854.
19. S. Lv, J. Chen, X. Chen, J. Chen and Y. Li, *ChemSusChem*, 2020, 13, 3495-3530.
20. R. Beltrán-Suito, P. W. Menezes and M. Driess, *J. Mater. Chem. A*, 2019, 7, 15749-15756.
21. H. Wang, S. Min, Q. Wang, D. Li, G. Casillas, C. Ma, Y. Li, Z. Liu, L. J. Li, J. Yuan, M. Antonietti and T. Wu, *ACS Nano*, 2017, 11, 4358-4364.
22. Z. Huang, Z. Chen, Z. Chen, C. Lv, M.G. Humphrey and C. Zhang, *Nano Energy*, 2014, 9, 373-382.
23. Z. Niu, J. Jiang and L. Ai, *Electrochem. Commun.*, 2015, 56, 56-60.
24. J. Yu, Q. Li, Y. Li, C. Y. Xu, L. Zhen, V. P. Dravid and J. Wu, *Adv. Funct. Mater.*, 2016, 26, 7644-7651.
25. S. Gao, Y. Liu, G. D. Li, Y. Guo, Y. Zou and X. Zou, *Electrochim. Acta*, 2016, 199, 99-107.
26. Y. Zhang, Q. Shao, S. Long and X. Huang, *Nano Energy*, 2018, 45, 448-455.
27. Y. You, W. Zeng, Y. X. Yin, J. Zhang, C. P. Yang, Y. Zhu and Y. G. Guo, *J.*

- Mater. Chem. A, 2015, 3, 4799-4802.
28. A. Sumboja, T. An, H. Y. Goh, M. Lübke, D. P. Howard, Y. Xu, A. D. Handoko, Y. Zong and Z. Liu, ACS Appl. Mater. Inter., 2018, 10, 15673-15680.
  29. Q. Liu, J. Tian, W. Cui, P. Jiang, N. Cheng, A. M. Asiri and X. Sun, Angew. Chem. Int. Ed., 2014, 53, 1-6.
  30. Y. Pan, Y. Lin, Y. Chen, Y. Liu and C. Liu, J. Mater. Chem. A, 2016, 13, 4745-4754.
